# Supplementary material for: Regulable pyrrolic-N-doped carbon materials as an efficient electrocatalyst for selective O2 reduction to H2O2
Source: Royal Society of Chemistry journal article supplement (doi:10.1039/d2nj02393h), 2022-01-01
Supplement: d2nj02393h1.pdf [file d2nj02393h1.pdf]

# Electronic supplementary Material (ESI) for New Journal of Chemistry

## Regulable Pyrrolic-N-doped Carbon Materials as an Efficient Electrocatalyst for Selective O<sub>2</sub> Reduction to H<sub>2</sub>O<sub>2</sub>

Yunxian Zhang,<sup>a</sup> Yongyu Pang,<sup>b</sup> Dong Xia,<sup>b</sup> and Guoliang Chai<sup>b, c\*</sup>

<sup>a</sup>College of Chemistry and Materials Science, Fujian Normal University, Fuzhou, Fujian 350007, P. R. China.

<sup>b</sup>State Key Laboratory of Structural Chemistry, Fujian Institute of Research on the Structure of Matter, Chinese Academy of Sciences, Fuzhou 350002, P. R. China. E-mail: g.chai@fjirsm.ac.cn

<sup>c</sup>Fujian Science & Technology Innovation Laboratory for Optoelectronic Information of China, Fuzhou, Fujian 350108, P. R. China.

Corresponding Author

E-mail: g.chai@fjirsm.ac.cn

## Electrochemical test for ORR

For all electrochemical measurements, an electrochemical workstation (Autolab PGSTAT302N) is used. Three-electrode system was utilized in the electrochemical measurement in which a glassy-carbon electrode (disk area: 0.196 cm<sup>2</sup>) with a Pt ring (ring area: 0.07 cm<sup>2</sup>) was used as the working electrode, saturated Ag/AgCl electrode was used as the reference electrode, and a Pt sheet was used as the counter electrode. 4.5 mg of the collected catalyst was dispersed in a mixture of 500  $\mu$ L of DI water, 40  $\mu$ L of 5 wt% Nafion solution and 460  $\mu$ L of isopropanol. After sonication for at least 30 min, 12  $\mu$ L of the ink was dropped onto the glassy-carbon disk electrode and dried at room temperature. Electrochemical tests were carried out in a 0.1 M KOH electrolyte (pH=13). The electrolytic cell containing the O<sub>2</sub>-saturated electrolyte was prepared before electrochemical testing. Oxygen was continuously flowing into the electrolyte during the test. The ring electrode was kept at 1.2 V vs. RHE, which can be used to oxidize the H<sub>2</sub>O<sub>2</sub> generated on the disk electrode. The cyclic voltammetry (CV) tests of catalysts were performed between 0.2 and 1.2 V vs. RHE at a scan rate of 200 mV s<sup>-1</sup> for 10 cycles. The ORR activities were assessed by linear sweep voltammetry (LSV) from 0.2 to 1.2 V vs. RHE at a scan rate of 20 mV s<sup>-1</sup> and a rotation speed of 1600 rpm. During the LSV, the Pt ring electrode was set at a constant potential of 1.2 V vs. RHE. The CV and LSV curves in N<sub>2</sub>-saturated electrolytes were also collected as a reference, respectively. The ring electrode collection efficiency (N) was 0.249 after calibration.

During 2e<sup>-</sup> ORR, the electron transfer number was calculated from the ring current and disk current as the following equation:

$$n = \frac{4 \times |I_{disk}|}{|I_{disk}| + I_{ring} / N} \quad (1)$$

The H<sub>2</sub>O<sub>2</sub> selectivity of 2e<sup>-</sup> ORR was calculated using the following relation:

$$H_2O_2\% = \frac{200 \times I_{ring}}{|I_{disk}| \times N + I_{ring}} \quad (2)$$

Tafel plots of catalysts were evaluated from the LSV curves. The diffusion-corrected kinetic current density ( $J_k$ ) was calculated from the following Koutechy–Levich (K-L) equation:

$$J_k = \frac{J \times J_{lim}}{J_{lim} - J} \quad (3)$$

where  $J_{lim}$  is the diffusion-limited current density,  $J_k$  is the kinetic current density and  $J$  is the measured current density.  $J_{lim}$  was calculated as follows

$$J_{lim} = 0.2nFC_0D_0^{2/3}\nu^{-1/6}\omega^{1/2} \quad (4)$$

where  $n$  is the electron transferred number,  $\omega$  is the electrode rotation speed (in rpm),  $D_0$  is the diffusion coefficient of oxygen ( $1.9 \times 10^{-5}$  cm<sup>2</sup> s<sup>-1</sup>),  $C_0$  is the volume concentration of O<sub>2</sub> ( $C_0 = 1.2 \times 10^{-3}$  mol L<sup>-1</sup>),  $F$  is the Faraday constant (96485 C mol<sup>-1</sup>),  $\nu$  is the kinematic viscosity of the solution (0.01 cm<sup>2</sup> s<sup>-1</sup>). Chronopotentiometry stability test was performed by holding the applied disk electrode potential at 0.45 V vs. RHE while the ring electrode potential was maintained at 1.20 V vs. RHE. The electrochemically active surface area was measured by double layer capacitance method. CV scans were conducted at potential window from -0.05 to 0.05 V vs. Ag/AgCl reference electrode with scan rates of 5, 10, 15, 20 and 25 mV s<sup>-1</sup>. To evaluate the CV cycling stability of the N-CMC-1:5, accelerated durability testing (ADT) of N-CMC-1:5 was performed by sweeping the potential 2500 times between 0.2 and 1.2 V vs. RHE at a scan rate of 200 mV s<sup>-1</sup>.

## Characterizations

X-ray diffraction (XRD) patterns were collected on Miniflex 600 with a scanning speed of 2° per minute. Scanning electron microscopy (SEM) images were obtained using a JSM6700 instrument (JEOL). The structural morphology and elemental distribution were collected on a transmission electron microscope (TEM, JEOL JEM-2010). The X-ray photoelectron spectroscopy (XPS) spectra were performed on an ESCALAB 250XI instrument. Raman spectroscopy was performed from a LabRAM HR spectrometer using a laser at 532 nm wavelength.

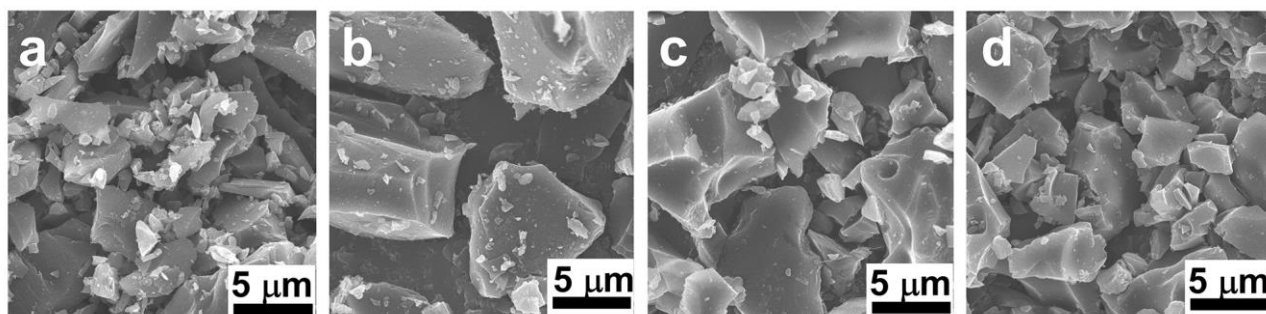

**Fig. S1.** SEM images of (a) CMC. (b) N-CMC-1:5. (c) N-CMC- 1:1. (d) N-CMC-4:1.

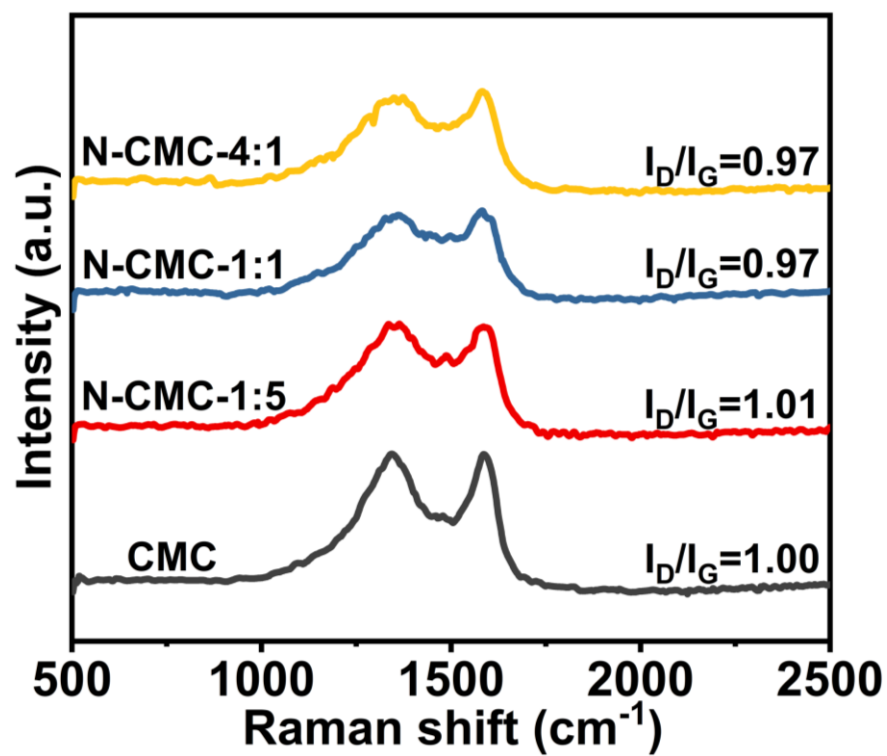

**Fig. S2.** Raman spectra of CMC, N-CMC-1:5, N-CMC-1:1, and N-CMC-4:1, with  $I_D/I_G$  ratios for each sample indicated.

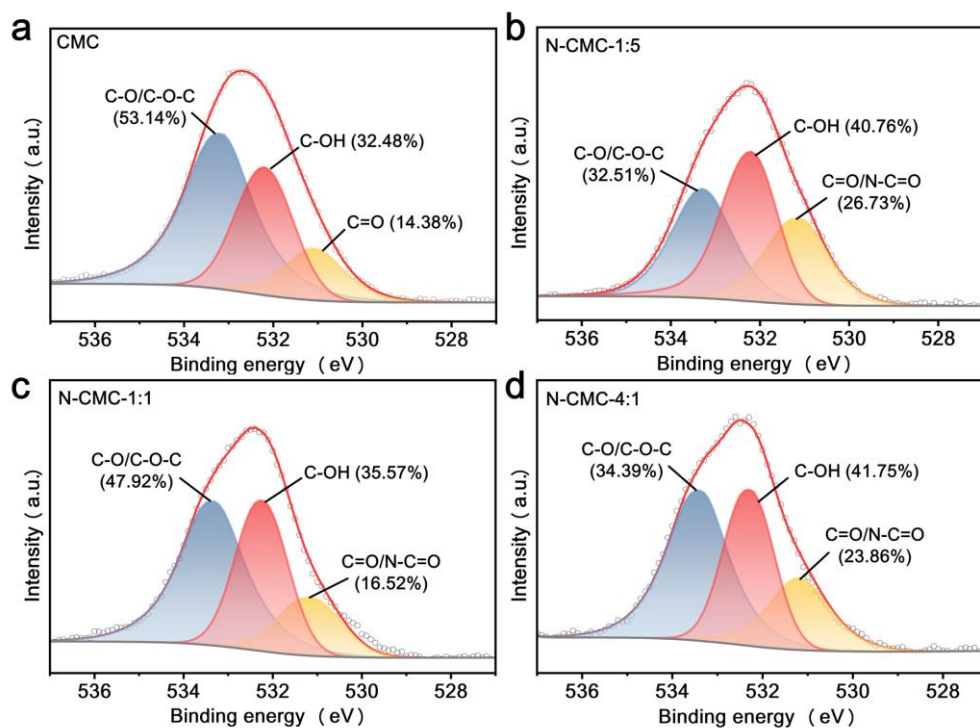

**Fig. S3.** High-resolution O 1s XPS spectra of (a) CMC, (b) N-CMC-1:5, (c) N-CMC-1:1 and (d) N-CMC-4:1, respectively.

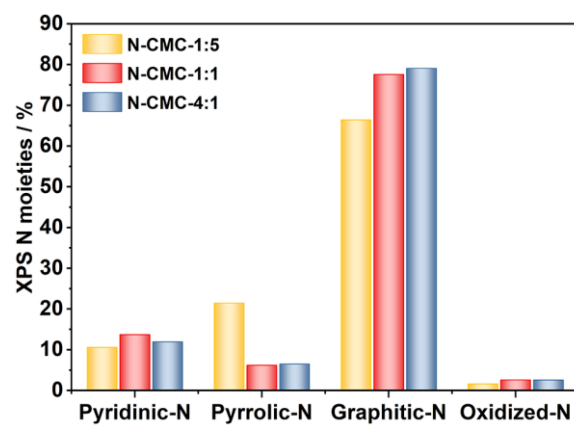

**Fig. S4.** The relative content change of various nitrogen species of the N-CMCs.

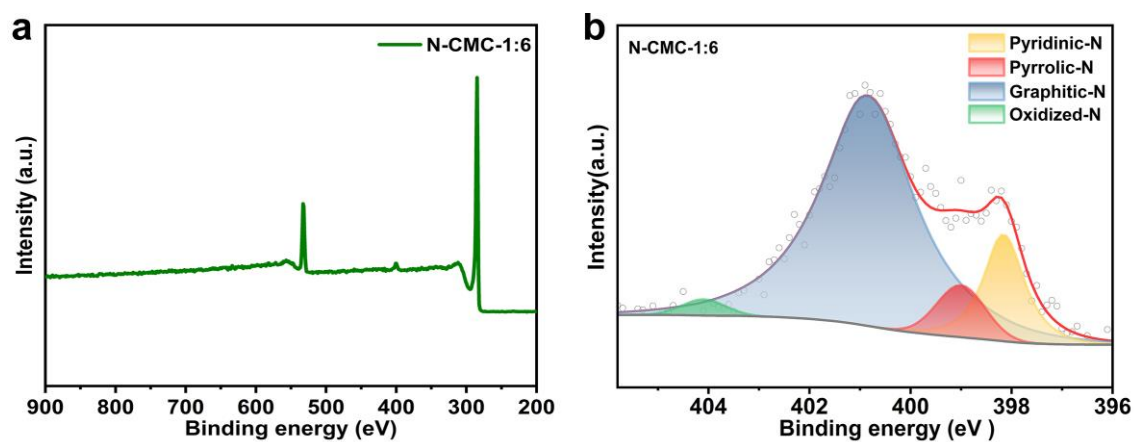

Fig. S5. (a) XPS survey scan of N-CMC-1:6, (b) High-resolution N1s XPS spectrogram of N-CMC-1:6.

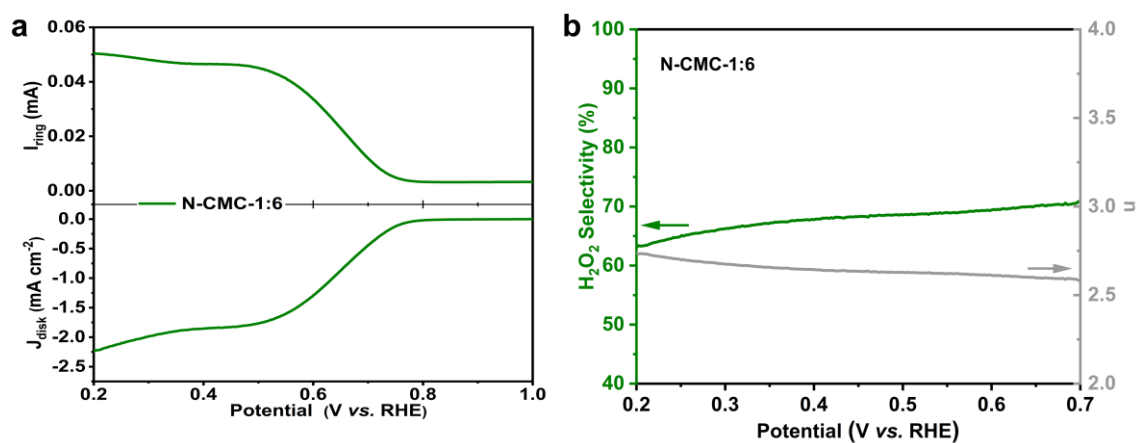

**Fig. S6.** (a) Linear sweep voltammetry of N-CMC-1:6 with the disk current density, ring current, (b)  $\text{H}_2\text{O}_2$  selectivity and Electron transfer numbers ( $n$ ) of N-CMC-1:6.



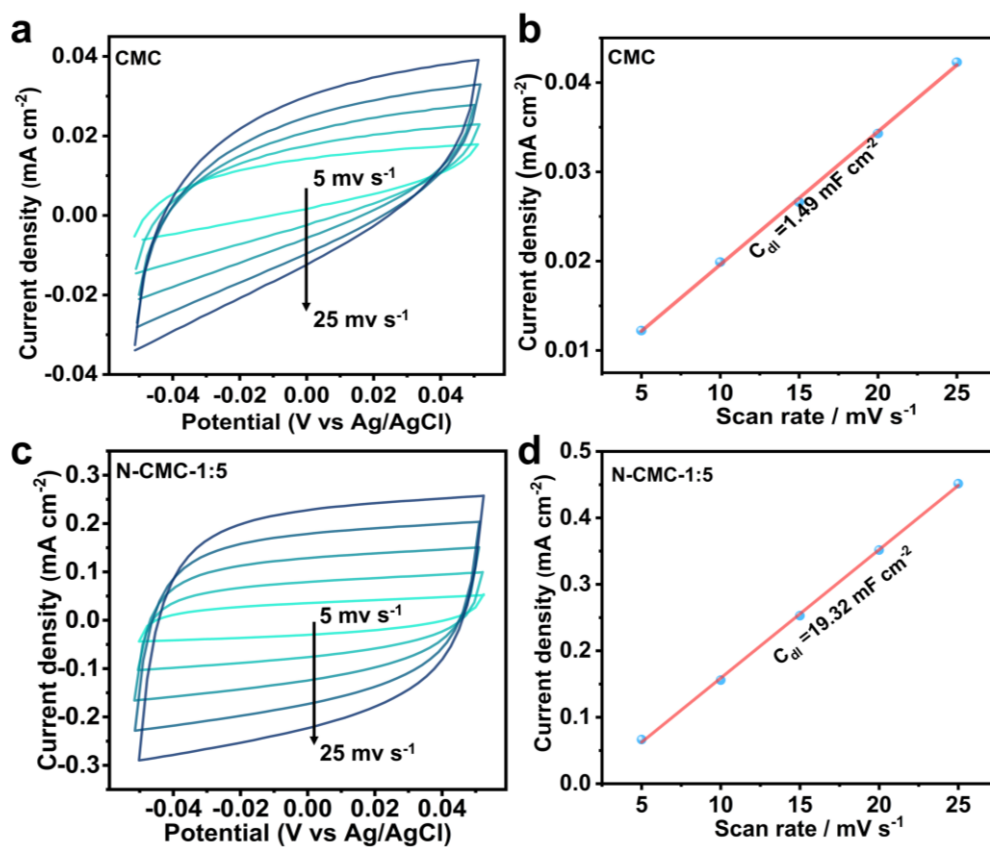

**Fig. S7.** (a, c) CV for CMC and N-CMC-1:5 modified electrodes in the double layer region at scan rates of 5, 10, 15, 20, and 25  $\text{mV s}^{-1}$  in 0.1 M KOH aqueous electrolyte. (b, d) current (taken at the potential of 0 V vs. Ag/AgCl) as a function of scan rate derived from (a, c), respectively.

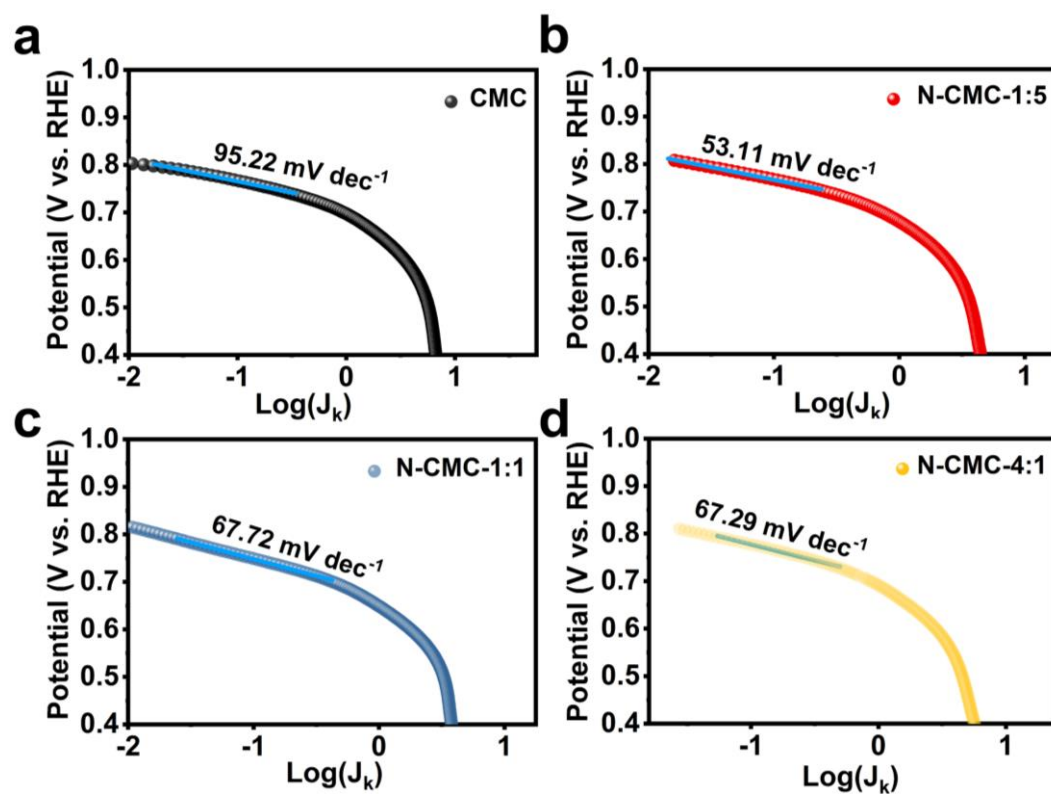

Fig. S8. Tafel plots for CMC, N-CMC-1:5, N-CMC-1:1 and N-CMC-4:1 for ORR in 0.1 M KOH.

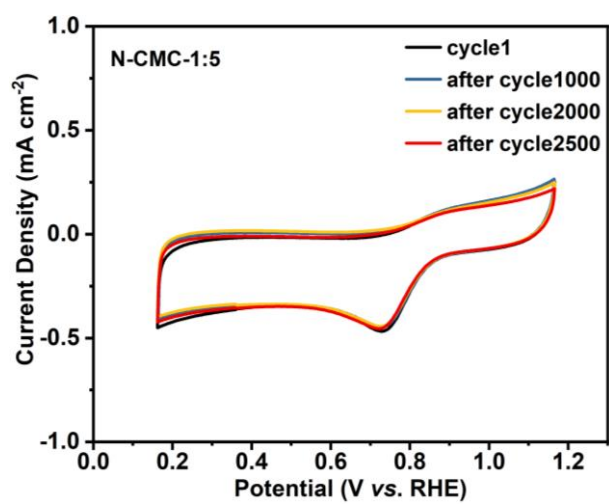

**Fig. S9.** CV cycling Stability performance of N-CMC-1:5 in 0.1 M KOH.

**Table S1.** Atomic content of C, O and N for CMC and N-CMCs according to XPS survey spectra.

| Sample    | C (at.%) | O (at.%) | N (at.%) |
|-----------|----------|----------|----------|
| CMC       | 91.15    | 8.85     | 0.00     |
| N-CMC-1:6 | 85.95    | 11.18    | 2.87     |
| N-CMC-1:5 | 83.08    | 13.77    | 3.15     |
| N-CMC-1:1 | 88.70    | 7.32     | 3.99     |
| N-CMC-4:1 | 87.50    | 8.11     | 4.39     |

**Table S2.** The percentage of different nitrogen configurations for N-CMCs.

| Sample    | N (at.%) | Pyridinic-N (%) | Pyrrolic-N (%) | Graphitic-N (%) | Oxidized-N (%) |
|-----------|----------|-----------------|----------------|-----------------|----------------|
| N-CMC-1:6 | 2.87     | 14.99           | 7.53           | 75.34           | 2.14           |
| N-CMC-1:5 | 3.15     | 10.56           | 21.43          | 66.41           | 1.59           |
| N-CMC-1:1 | 3.99     | 13.69           | 6.18           | 77.55           | 2.58           |
| N-CMC-4:1 | 4.39     | 11.90           | 6.46           | 79.09           | 2.56           |

**Table S3.** Comparison of 2e<sup>-</sup> ORR performance for different electrocatalysts.

|                              | pH        | Potential (V <sub>RHE</sub> ) | Selectivity (%) for 2e <sup>-</sup> ORR | References       |
|------------------------------|-----------|-------------------------------|-----------------------------------------|------------------|
| Co–N–C                       | 13        | 0.20V                         | ~82%                                    | 1                |
| Mesoporous defective carbon  | 13        | 0.55V                         | 80%                                     | 2                |
| <b>N-CMC-1:5</b>             | <b>13</b> | <b>0.42V</b>                  | <b>~81.4%</b>                           | <b>This work</b> |
| M <sub>01</sub> /OSG-H       | 13        | 0.35V                         | 95%                                     | 3                |
| NCMK3IL50_800T               | 7         | 0.2V                          | 75.7%                                   | 4                |
| Hierarchically porous carbon | 7         | 0.16V                         | 70.8%                                   | 5                |
| RO-SWCNHs                    | 7         | 0.30V                         | 95%                                     | 6                |

## Reference:

1. B. Q. Li, C. X. Zhao, J. N. Liu and Q. Zhang, *Adv. Mater.*, 2019, **31**, 1808173.
2. S. Chen, Z. Chen, S. Siahrostami, T. R. Kim, D. Nordlund, D. Sokaras, S. Nowak, J. W. F. To, D. Higgins, R. Sinclair, J. K. Nørskov, T. F. Jaramillo and Z. Bao, *ACS Sustain. Chem. Eng.*, 2018, **6**, 311-317.
3. C. Tang, Y. Jiao, B. Shi, J.-N. Liu, Z. Xie, X. Chen, Q. Zhang and S.-Z. Qiao, *Angew. Chem. Int. Ed.*, 2020, **59**, 9171-9176.
4. Y. Sun, I. Sinev, W. Ju, A. Bergmann, S. Dresp, S. Kuehl, C. Spöerl, H. Schmies, H. Wang, D. Bernsmeier, B. Paul, R. Schmack, R. Kraehnert, B. Roldan Cuenya and P. Strasser, *ACS Catal.*, 2018, **8**, 2844-2856.
5. Y. Liu, X. Quan, X. Fan, H. Wang and S. Chen, *Angew. Chem. Int. Ed.*, 2015, **54**, 6837-6841.
6. Y. Liu, J. Zhang, S. He, Y. Cui and L. Guan, *J. Energy Chem.*, 2021, **54**, 118-123.
